# Supplementary material for: Usefulness of the Population Health Metrics Research Consortium gold standard verbal autopsy data for general verbal autopsy methods
Source: PubMed Central journal article supplement (PMC3912496; doi:10.1186/1741-7015-12-23), 2014-02-04
Supplement: 1741-7015-12-23-S1.pdf [file 1741-7015-12-23-S1.pdf]

| WHO 2012<br>VA code | WHO 2012 InterVA-4 indicator                                                  | Equivalent PHMRC variable(s)<br>(IHME_PHMRC_VA_DATA_CODEBOOK_Y2013M09D11_0.xlsx)                                                                     |
|---------------------|-------------------------------------------------------------------------------|------------------------------------------------------------------------------------------------------------------------------------------------------|
| 1A110A              | Was the deceased male?                                                        | g1_05                                                                                                                                                |
| 1A110B              | Was the deceased female?                                                      |                                                                                                                                                      |
| 1A260A              | Was (s)he aged 65 years or over at death?                                     | g1_01d; g1_01m; g1_01y; g1_06d; g1_06m; g1_06y; g5_01d;<br>g5_01m; g5_01y; g5_03d; g5_03m; g5_03y; g1_07a; g1_07b; g1_07c;<br>g5_04a; g5_04b; g5_04c |
| 1A260B              | Was (s)he aged 50 to 64 years at death?                                       |                                                                                                                                                      |
| 1A260C              | Was (s)he aged 15-49 years at death?                                          |                                                                                                                                                      |
| 1A260D              | Was (s)he aged 5 to 14 years at death?                                        |                                                                                                                                                      |
| 1A260E              | Was (s)he aged 1 to 4 years at death?                                         |                                                                                                                                                      |
| 1A260F              | Was (s)he aged 1 to 11 months at death?                                       |                                                                                                                                                      |
| 1A260G              | Was (s)he aged 28 days or less at death?                                      |                                                                                                                                                      |
| 1A260H              | Did the baby die within 24 hours of birth?                                    |                                                                                                                                                      |
| 1A260I              | Did baby die more than 24 hours after but less than 48 hours from birth?      |                                                                                                                                                      |
| 1A260J              | Did baby die more than 48 hours from birth but within the first week of life? |                                                                                                                                                      |
| 1A260K              | Did baby die after first week, but within first 28 days?                      |                                                                                                                                                      |
| 1A260L              | Was this a woman aged 12 to 19 years at death?                                |                                                                                                                                                      |
| 1A260M              | Was this a woman aged 20-34 years at death?                                   |                                                                                                                                                      |
| 1A260N              | Was this a woman aged 35-49 years at death?                                   |                                                                                                                                                      |
| 3A100               | Was there any diagnosis of Tuberculosis?                                      | a1_01_4                                                                                                                                              |
| 3A110               | Was there any diagnosis of HIV/AIDS?                                          | a1_01_14                                                                                                                                             |
| 3A120               | Did (s)he have a recent positive test for malaria?                            | not available                                                                                                                                        |
| 3A130               | Did (s)he have a recent negative test for malaria?                            | not available                                                                                                                                        |
| 3A140               | Was there any diagnosis of Measles?                                           | not available                                                                                                                                        |
| 3A150               | Was there any diagnosis of High Blood pressure?                               | a1_01_10                                                                                                                                             |
| 3A160               | Was there any diagnosis of heart disease?                                     | a1_01_9                                                                                                                                              |
| 3A170               | Was there any diagnosis of diabetes?                                          | a1_01_7                                                                                                                                              |
| 3A180               | Was there any diagnosis of asthma?                                            | a1_01_1                                                                                                                                              |
| 3A190               | Was there any diagnosis of epilepsy?                                          | a1_01_8                                                                                                                                              |
| 3A200               | Was there any diagnosis of cancer?                                            | a1_01_3                                                                                                                                              |
| 3A210               | Was there any diagnosis of Chronic Obstructive Pulmonary Disease (COPD)?      | a1_01_13                                                                                                                                             |

| WHO 2012<br>VA code | WHO 2012 InterVA-4 indicator                                        | Equivalent PHMRC variable(s)<br>(IHME_PHMRC_VA_DATA_CODEBOOK_Y2013M09D11_0.xlsx) |
|---------------------|---------------------------------------------------------------------|----------------------------------------------------------------------------------|
| 3A220               | Was there any diagnosis of dementia?                                | a1_01_5                                                                          |
| 3A230               | Was there any diagnosis of depression?                              | a1_01_6                                                                          |
| 3A240               | Was there any diagnosis of stroke?                                  | a1_01_12                                                                         |
| 3A250               | Was there any diagnosis of sickle cell disease?                     | not available                                                                    |
| 3A260               | Was there any diagnosis of kidney disease?                          | not available                                                                    |
| 3A270               | Was there any diagnosis of liver disease?                           | not available                                                                    |
| 3A280               | Did (s)he die during the wet season?                                | not available                                                                    |
| 3A290               | Did (s)he die during the dry season?                                | not available                                                                    |
| 3A300A              | Was (s)he ill for less than 3 weeks before death?                   | a2_01 < 21; c1_21 < 21                                                           |
| 3A300B              | Was (s)he ill for 3 weeks or more before death?                     | a2_01 >= 21; c1_21 >= 21                                                         |
| 3A310               | Did (s)he die suddenly?                                             | a2_01 <= 1; c1_21=0 & c1_26 <> "Stillbirth"; c3_49                               |
| 3B100               | Did (s)he have a fever?                                             | a2_02; a2_05 & a2_06; c3_26; c4_01                                               |
| 3B110A              | Did (s)he have fever for less than 2 weeks before death?            | fever & a2_03 < 14; c3_26 & c3_28 < 14; c4_01 & c4_02 < 14                       |
| 3B110B              | Did (s)he have fever for 2 weeks or more before death?              | fever & a2_03 >= 14; c3_26 & c3_28 >=14; c4_01 & c4_02 >= 14                     |
| 3B120               | Did (s)he have night sweats?                                        | a2_06; c4_05 = "Only at night"                                                   |
| 3B130               | Did (s)he have a cough?                                             | a2_32; c4_12                                                                     |
| 3B140A              | Did (s)he have a cough for less than 3 weeks before death?          | a2_32 & a2_33 < 14; c4_12 & c4_13 < 14                                           |
| 3B140B              | Did (s)he have a cough for 3 weeks or more before death?            | a2_32 & a2_33 >= 14; c4_12 & c4_13 >= 14                                         |
| 3B150               | Was the cough productive, with sputum?                              | a2_32 & a2_34                                                                    |
| 3B160               | Did (s)he cough up blood?                                           | a2_32 & a2_35                                                                    |
| 3B170               | Did (s)he make a whooping sound when coughing?                      | not available                                                                    |
| 3B180               | Did (s)he have any breathing problem?                               | a2_36; a2_40; a2_42; c3_05; c3_17; c4_16                                         |
| 3B190               | Did (s)he have fast breathing?                                      | a2_40; c3_20; c4_18                                                              |
| 3B200A              | Did (s)he have fast breathing for less than 2 weeks?                | a2_40 & a2_41 < 14; c3_20 & c3_21 < 14; c4_18 & c4_19 < 14                       |
| 3B200B              | Did (s)he have fast breathing for 2 weeks or more?                  | a2_40 & a2_41 >= 14; c3_20 & c3_21 >= 14; c4_18 & c4_19 >= 14                    |
| 3B210               | Did (s)he have breathlessness?                                      | not available                                                                    |
| 3B220A              | Did (s)he have breathlessness for less than 2 weeks?                | not available                                                                    |
| 3B220B              | Did (s)he have breathlessness for 2 weeks or more?                  | not available                                                                    |
| 3B230               | Was (s)he unable to carry out daily routines due to breathlessness? | a2_36 & a2_39_1 = "Walking/Exertion"                                             |
| 3B240               | Was (s)he breathless while lying flat?                              | a2_36 & a2_39_1 = "Lying"                                                        |

| WHO 2012<br>VA code | WHO 2012 InterVA-4 indicator                                                 | Equivalent PHMRC variable(s)<br>(IHME_PHMRC_VA_DATA_CODEBOOK_Y2013M09D11_0.xlsx) |
|---------------------|------------------------------------------------------------------------------|----------------------------------------------------------------------------------|
| 3B250               | Did you see the lower chest wall/ribs being pulled in as the child breathed? | c3_23; c4_20                                                                     |
| 3B260               | Did (s)he have noisy breathing (grunting or wheezing)?                       | a2_42; c3_24; c4_23; c4_24                                                       |
| 3B270               | Did (s)he have severe chest pain?                                            | a2_43                                                                            |
| 3B280               | Did (s)he have diarrhoea?                                                    | a2_47; c3_44; c4_06                                                              |
| 3B290A              | Did (s)he have diarrhoea for less than 2 weeks?                              | a2_47 & a2_48 < 14; c4_06 & c4_08 < 14;                                          |
| 3B290B              | Did (s)he have diarrhoea for 2 to 4 weeks?                                   | a2_47 & a2_48 >= 14 & a2_48 < 28; c4_06 & c4_08 >=14 & c4_08 < 28                |
| 3B290C              | Did (s)he have diarrhoea for 4 weeks or more?                                | a2_47 & a2_48 >= 28; c4_06 & c4_08 >= 28                                         |
| 3B300               | At any time during the final illness was there blood in the stools?          | a2_47 & a2_50; c4_11                                                             |
| 3B310               | Did (s)he vomit?                                                             | a2_53; c3_46                                                                     |
| 3B320               | Did (s)he vomit "coffee grounds" or bright red/blood?                        | a2_55                                                                            |
| 3B330               | Did (s)he have any abdominal problem?                                        | a2_61; a2_64; a2_67; c4_40                                                       |
| 3B340               | Did (s)he have severe abdominal pain?                                        | a2_61; a3_09                                                                     |
| 3B350A              | Did (s)he have severe abdominal pain for less than 2 weeks?                  | a2_61 & a2_62 < 14                                                               |
| 3B350B              | Did (s)he have severe abdominal pain for 2 weeks or more?                    | a2_61 & a2_62 >= 14                                                              |
| 3B360               | Did (s)he have a more than usually protruding abdomen?                       | a2_64; c4_40                                                                     |
| 3B370A              | Did (s)he have a more than usually protruding abdomen for less than 2 weeks? | a2_64 & a2_65 < 14                                                               |
| 3B370B              | Did (s)he have a more than usually protruding abdomen for 2 weeks or more?   | a2_64 & a2_65 >= 14                                                              |
| 3B380               | Did (s)he have any mass in the abdomen?                                      | a2_67                                                                            |
| 3B390A              | Did (s)he have a lump inside the abdomen for less than 2 weeks?              | a2_67 & a2_65 < 14                                                               |
| 3B390B              | Did (s)he have a lump inside the abdomen for 2 weeks or more?                | a2_67 & a2_65 >= 14                                                              |
| 3B400               | Did (s)he have a severe headache?                                            | a2_69                                                                            |
| 3B405               | Did (s)he have a stiff or painful neck?                                      | a2_72; c4_28                                                                     |
| 3B410A              | Did (s)he have a stiff or painful neck for less than 1 week?                 | a2_72 & a2_73 < 7                                                                |
| 3B410B              | Did (s)he have a stiff or painful neck for 1 week or more?                   | a2_72 & a2_73 >= 7                                                               |
| 3B420               | Did (s)he have mental confusion?                                             | a2_78                                                                            |
| 3B430A              | Did (s)he have mental confusion for 3 months or more?                        | a2_78 & a2_79 > 3                                                                |
| 3B440               | Was (s)he unconscious for more than 24 hours before death?                   | a2_74 & a2_76 >=1; c4_27 = "24 hours or more"                                    |

| WHO 2012<br>VA code | WHO 2012 InterVA-4 indicator                                                                           | Equivalent PHMRC variable(s)<br>(IHME_PHMRC_VA_DATA_CODEBOOK_Y2013M09D11_0.xlsx) |
|---------------------|--------------------------------------------------------------------------------------------------------|----------------------------------------------------------------------------------|
| 3B450               | Did the unconsciousness start suddenly, quickly (at least within a single day)?                        | a2_74 & a2_76 >=1 & a2_75="Suddenly"                                             |
| 3B460               | Did (s)he have convulsions?                                                                            | a2_82; c3_25; c4_25                                                              |
| 3B470A              | Did the convulsions last for less than 10 minutes?                                                     | a2_82 & a2_83 < 0.007                                                            |
| 3B470B              | Did the convulsions last for 10 minutes or more?                                                       | a2_82 & a2_83 >= 0.007                                                           |
| 3B480               | Did (s)he become unconscious immediately after the convulsion?                                         | a2_82 & a2_84                                                                    |
| 3B490               | Did (s)he have any urine problems?                                                                     | a2_52                                                                            |
| 3B500               | Did (s)he pass no urine at all?                                                                        | a2_52                                                                            |
| 3B510               | Did (s)he go to urinate more often than usual?                                                         | not available                                                                    |
| 3B520               | During the final illness did (s)he ever pass blood in the urine?                                       | not available                                                                    |
| 3B530               | Did (s)he have any skin problems?                                                                      | a2_10; a2_13; a2_07; c4_30                                                       |
| 3B540               | Did (s)he have any ulcers, abscess or sores anywhere except on the feet?                               | a2_10                                                                            |
| 3B550               | Did (s)he have any ulcers, abscess or sores on the feet that were not also on other parts of the body? | a2_13                                                                            |
| 3B560               | During the illness that led to death, did (s)he have any skin rash?                                    | a2_07; c4_30                                                                     |
| 3B570A              | Did (s)he have the skin rash for less than 1 week?                                                     | a2_07 & a2_08 < 7; c4_30 & c4_33 < 7                                             |
| 3B570B              | Did (s)he have the skin rash for 1 week or more?                                                       | a2_07 & a2_08 >= 7; c4_30 & c4_33 >=7                                            |
| 3B580               | Did (s)he have measles rash?                                                                           | not available                                                                    |
| 3B590               | Did (s)he ever have shingles or herpes zoster?                                                         | not available                                                                    |
| 3B600               | Did (s)he bleed from the nose, mouth or anus?                                                          | not available                                                                    |
| 3B610               | Did (s)he have noticeable weight loss?                                                                 | a2_18; c4_35                                                                     |
| 3B620               | Was (s)he severely thin or wasted?                                                                     | a2_18 & a2_19="Large"; c4_35                                                     |
| 3B630               | Did (s)he have mouth sores or white patches in the mouth or on the tongue?                             | c4_43                                                                            |
| 3B640               | Did (s)he have stiffness of the whole body or was unable to open the mouth?                            | a2_87_7                                                                          |
| 3B650               | Did (s)he have swelling (puffiness) of the face?                                                       | a2_25                                                                            |
| 3B660               | Did (s)he have both feet swollen?                                                                      | c4_36                                                                            |
| 3B670               | Did (s)he have any lumps?                                                                              | a2_29; a2_30; a3_01; a2_31                                                       |
| 3B680               | Did (s)he have any lumps or lesions in the mouth?                                                      | not available                                                                    |

| WHO 2012<br>VA code | WHO 2012 InterVA-4 indicator                                                        | Equivalent PHMRC variable(s)<br>(IHME_PHMRC_VA_DATA_CODEBOOK_Y2013M09D11_0.xlsx) |
|---------------------|-------------------------------------------------------------------------------------|----------------------------------------------------------------------------------|
| 3B690               | Did (s)he have any lumps on the neck?                                               | a2_29                                                                            |
| 3B700               | Did (s)he have any lumps on the armpit?                                             | a2_30; c4_42                                                                     |
| 3B710               | Did (s)he have any lumps on the groin?                                              | a2_31                                                                            |
| 3B720               | Did she have an ulcer or swelling in the breast?                                    | a3_01                                                                            |
| 3B730               | Did (s)he have paralysis of one side of the body?                                   | a2_87_1; a2_87_2                                                                 |
| 3B740               | Did (s)he have difficulty or pain while swallowing liquids?                         | a2_57                                                                            |
| 3B750               | Did (s)he have yellow discoloration of the eyes?                                    | a2_21                                                                            |
| 3B760               | Did her/his hair colour change to reddish or yellowish?                             | c4_39                                                                            |
| 3B770               | Did (s)he look pale (thinning/lack of blood) or have pale palms, eyes or nail beds? | a2_20; c4_41                                                                     |
| 3B780               | Did (s)he have sunken eyes?                                                         | not available                                                                    |
| 3B790               | Did (s)he drink a lot more water than usual?                                        | not available                                                                    |
| 3B800               | Did she have excessive vaginal bleeding in between menstrual periods?               | a3_05                                                                            |
| 3B810               | Did her vaginal bleeding stopped naturally during menopause?                        | a3_03                                                                            |
| 3B820               | Did she have vaginal bleeding after menopause?                                      | a3_04                                                                            |
| 3C100               | Was she neither pregnant, nor delivered, within 6 weeks of her death?               | NOT(a3_10 or a3_18 or a3_17)                                                     |
| 3C110               | Was she pregnant at the time of death?                                              | a3_10                                                                            |
| 3C120               | Did she die within 6 weeks of giving birth?                                         | a3_18                                                                            |
| 3C130               | Did she die within 6 weeks of a pregnancy that lasted less than 6 months?           | a3_17                                                                            |
| 3C200               | Did she die within 24 hours after delivery?                                         | not available                                                                    |
| 3C210               | Did she die during labour, but undelivered?                                         | a3_15                                                                            |
| 3C220               | Was she breastfeeding at death?                                                     | not available                                                                    |
| 3C230A              | Was this the woman's first pregnancy?                                               | not available                                                                    |
| 3C230B              | Did she have four or more births, including stillbirths, before this pregnancy?     | not available                                                                    |
| 3C240               | Did she have any previous Caesarean section?                                        | not available                                                                    |
| 3C250               | Did she die during or after a multiple pregnancy?                                   | not available                                                                    |
| 3C260               | During pregnancy, did she suffer from high blood pressure?                          | not available                                                                    |

| WHO 2012<br>VA code | WHO 2012 InterVA-4 indicator                                                                | Equivalent PHMRC variable(s)<br>(IHME_PHMRC_VA_DATA_CODEBOOK_Y2013M09D11_0.xlsx) |
|---------------------|---------------------------------------------------------------------------------------------|----------------------------------------------------------------------------------|
| 3C270               | Did she have foul smelling vaginal discharge during pregnancy or after delivery?            | a3_20                                                                            |
| 3C280               | During the last 3 months of pregnancy, did she suffer from convulsions?                     | not available                                                                    |
| 3C290               | During the last 3 months of pregnancy did she suffer from blurred vision?                   | not available                                                                    |
| 3C300               | Did she give birth to a live, healthy baby within 6 weeks of death?                         | not available                                                                    |
| 3C310               | Was there excessive vaginal bleeding during pregnancy or after delivery?                    | a3_13; a3_14; a3_19                                                              |
| 3C320               | Was there vaginal bleeding during the first 6 months of pregnancy?                          | not available                                                                    |
| 3C330               | Was there vaginal bleeding during the last 3 months of pregnancy but before labour started? | a3_13                                                                            |
| 3C340               | Was there excessive vaginal bleeding during labour?                                         | a3_14                                                                            |
| 3C350               | Was there excessive vaginal bleeding after delivering the baby?                             | a3_19                                                                            |
| 3C360               | Was the placenta not completely delivered?                                                  | not available                                                                    |
| 3C365               | Did she deliver or try to deliver an abnormally positioned baby?                            | not available                                                                    |
| 3C370               | Was she in labour for unusually long (more than 24 hours)?                                  | a3_16 > 1                                                                        |
| 3C380               | Did she attempt to terminate the pregnancy?                                                 | not available                                                                    |
| 3C390               | Did she recently have a pregnancy that ended in an abortion (spontaneous or induced)?       | a3_17                                                                            |
| 3C400               | Did she give birth in a health facility?                                                    | not available                                                                    |
| 3C410               | Did she give birth at home?                                                                 | not available                                                                    |
| 3C420               | Did she give birth elsewhere, e.g. on the way to a facility?                                | not available                                                                    |
| 3C430               | Did she receive professional assistance during the delivery?                                | not available                                                                    |
| 3C440               | Did she have an operation to remove her uterus shortly before death?                        | not available                                                                    |
| 3C450               | Did she have a normal vaginal delivery?                                                     | not available                                                                    |
| 3C460               | Did she have an assisted delivery, with forceps/vacuum?                                     | not available                                                                    |
| 3C470               | Did she deliver by Caesarean section?                                                       | not available                                                                    |
| 3C480               | Was the baby born more than one month early?                                                | not available                                                                    |

| WHO 2012<br>VA code | WHO 2012 InterVA-4 indicator                                                                         | Equivalent PHMRC variable(s)<br>(IHME_PHMRC_VA_DATA_CODEBOOK_Y2013M09D11_0.xlsx) |
|---------------------|------------------------------------------------------------------------------------------------------|----------------------------------------------------------------------------------|
| 3D100               | Was the child part of a multiple birth?                                                              | c1_01= "Multiple"                                                                |
| 3D110               | Was the child born in a complicated delivery?                                                        | c2_01_5; c2_01_6; c2_01_14; c2_10 >= 1 & c2_10 < 7                               |
| 3D120               | Was the baby born 24 hours or more after the water broke?                                            | c2_07 = "One day or more"                                                        |
| 3D130               | Did the baby stop moving in the womb before labour started?                                          | c2_04 = "No"                                                                     |
| 3D140               | Was baby born in a normal vaginal delivery?                                                          | c2_17 = "Vaginal Don't Know"; c2_17 = "Vaginal without Forceps"                  |
| 3D150               | Was baby born with forceps/vacuum?                                                                   | c2_17 = "Vaginal with Forceps"                                                   |
| 3D160               | Was baby delivered by Caesarean section?                                                             | c2_17 = "C-section"                                                              |
| 3D170               | Did the baby's bottom, feet, arm or hand come into the vagina before its head?                       | c2_01_5                                                                          |
| 3D180               | Was the baby of abnormal size?                                                                       | c1_08b < 2500; c1_08b > 4500                                                     |
| 3D190               | Was the baby smaller than normal, weighing under 2.5 kg?                                             | c1_08b < 2500                                                                    |
| 3D200               | Was the baby larger than normal, weighing over 4.5 kg?                                               | c1_08b > 4500                                                                    |
| 3D210A              | Had the pregnancy lasted less than 34 weeks when the baby was born?                                  | c2_02 = 210; c2_03 = "Early"                                                     |
| 3D210B              | Had the pregnancy lasted between 34 and 37 weeks when the baby was born?                             | c2_02 = 240                                                                      |
| 3D210C              | Had the pregnancy lasted more than 37 weeks when the baby was born?                                  | c2_02 = 270; c2_03 = "On time"; c2_03 = "Late"                                   |
| 3D220               | Was the umbilical cord wrapped several times (more than once) around the neck of the child at birth? | c2_01_7                                                                          |
| 3D230               | Did the baby/the child have any noticeable malformation?                                             | c3_02                                                                            |
| 3D240               | Did the baby/the child have a swelling/defect on the back?                                           | c3_03_3                                                                          |
| 3D250               | Did the baby/the child have a very large head?                                                       | c3_03_2                                                                          |
| 3D260               | Did the baby/the child have a very small head?                                                       | c3_03_1                                                                          |
| 3D270               | Was the baby/the child not growing normally?                                                         | not available                                                                    |
| 3D280               | Was the baby blue in colour at birth?                                                                | not available                                                                    |
| 3D290               | Did the baby cry after birth, even if only a little bit?                                             | c3_07                                                                            |
| 3D300               | Did the baby breathe after birth, even a little?                                                     | c3_04                                                                            |
| 3D310               | Was the baby given assistance to breathe at birth?                                                   | c3_06                                                                            |
| 3D320               | If the baby did not cry or breathe, was it born dead?                                                | c1_11 = "Dead"; c1_26 = "Stillbirth"; c1_15                                      |

| WHO 2012<br>VA code | WHO 2012 InterVA-4 indicator                                                                   | Equivalent PHMRC variable(s)<br>(IHME_PHMRC_VA_DATA_CODEBOOK_Y2013M09D11_0.xlsx) |
|---------------------|------------------------------------------------------------------------------------------------|----------------------------------------------------------------------------------|
| 3D330               | Was the dead baby macerated, that is, showed signs of decay?                                   | c1_17                                                                            |
| 3D340               | Was the baby able to suckle or bottle-feed within the first 24 hours after birth?              | c3_11                                                                            |
| 3D350               | Did the baby stop suckling or bottle feeding 3 days after birth?                               | c3_14 >= 3                                                                       |
| 3D360               | Did the baby have convulsions starting within the first day of life?                           | not available                                                                    |
| 3D370               | Did the baby have convulsions starting on the second day or later after birth?                 | not available                                                                    |
| 3D380               | Did the baby's body become stiff, with the back arched backwards?                              | not available                                                                    |
| 3D390               | Did the child have a bulging or raised fontanelle?                                             | c3_24                                                                            |
| 3D400               | Did the child have a sunken fontanelle?                                                        | not available                                                                    |
| 3D410               | Did the baby become unresponsive or unconscious soon after birth (within less than 24 hours)?  | not available                                                                    |
| 3D420               | Did the baby become unresponsive or unconscious more than 1 day after birth?                   | c3_33                                                                            |
| 3D430               | Did the baby become cold to the touch before it died?                                          | c3_29                                                                            |
| 3D440               | Did the baby have redness or discharge from the umbilical cord stump?                          | c3_35; c3_36                                                                     |
| 3D450               | Did the baby have yellow palms or soles?                                                       | c3_47; c3_48                                                                     |
| 3D460               | Did the mother NOT receive tetanus toxoid (TT) vaccine?                                        | c2_11 = "No"                                                                     |
| 3D500A              | Was this baby born from the mother's first pregnancy?                                          | c1_02 = "First"                                                                  |
| 3D500B              | Did the mother have 4 or more births before this baby was born?                                | not available                                                                    |
| 3D510               | During pregnancy, did the baby's mother suffer from high blood pressure?                       | c2_01_2                                                                          |
| 3D520               | Did the baby's mother have foul smelling vaginal discharge during pregnancy or after delivery? | not available                                                                    |
| 3D530               | During the last 3 months of pregnancy, did the baby's mother suffer from convulsions?          | c2_01_1                                                                          |
| 3D540               | During the last 3 months of pregnancy did the baby's mother suffer from blurred vision?        | not available                                                                    |



| WHO 2012<br>VA code | WHO 2012 InterVA-4 indicator                                                                                 | Equivalent PHMRC variable(s)<br>(IHME_PHMRC_VA_DATA_CODEBOOK_Y2013M09D11_0.xlsx)                                                                 |
|---------------------|--------------------------------------------------------------------------------------------------------------|--------------------------------------------------------------------------------------------------------------------------------------------------|
| 3D550               | Did the baby's mother have vaginal bleeding during the last 3 months of pregnancy but before labour started? | c2_01_8                                                                                                                                          |
| 3D560               | Was the child born in a health facility?                                                                     | c2_13a = "Hospital"; c2_13a = "Other Health Facility"                                                                                            |
| 3D570               | Was the child born at home?                                                                                  | c2_13a = "Home"                                                                                                                                  |
| 3D580               | Was the child born somewhere else, e.g. on the way to a facility?                                            | c2_13a = "On Route to Health Facility"                                                                                                           |
| 3D590               | Did the mother receive professional assistance during the delivery?                                          | c2_15a = "Doctor"; c2_15a = "Nurse/midwife"                                                                                                      |
| 3E100               | Did (s)he suffer from any injury or accident that led to her/his death?                                      | a5_01_1; a5_01_2; a5_01_3; a5_01_4; a5_01_5; a5_01_6; a5_01_7; a5_01_9a; c4_47_1; c4_47_2; c4_47_3; c4_47_4; c4_47_5; c4_47_6; c4_47_7; c4_47_8a |
| 3E110               | Was it a road traffic accident?                                                                              | a5_01_1; c4_47_1                                                                                                                                 |
| 3E300               | Was (s)he Injured in a non-road transport accident?                                                          | not available                                                                                                                                    |
| 3E310               | Was (s)he Injured in a fall?                                                                                 | a5_01_2; c4_47_2                                                                                                                                 |
| 3E320               | Did (s)he die of drowning?                                                                                   | a5_01_3; c4_47_3                                                                                                                                 |
| 3E330               | Did (s)he suffer from burns?                                                                                 | a5_01_6; c4_47_6                                                                                                                                 |
| 3E340               | Did (s)he suffer from any plant/ animal/insect bite or sting that led to her/his death?                      | a5_01_5; c4_47_5                                                                                                                                 |
| 3E500               | Was (s)he injured by a force of nature?                                                                      | not available                                                                                                                                    |
| 3E510               | Was there any poisoning?                                                                                     | a5_01_4; c4_47_4                                                                                                                                 |
| 3E520               | Was (s)he subject to violence/assault?                                                                       | a5_01_7; c4_47_7                                                                                                                                 |
| 3E530               | Was the injury intentionally inflicted by someone else?                                                      | a5_03; c4_48                                                                                                                                     |
| 3E700               | Do you think (s)he committed suicide?                                                                        | a5_02                                                                                                                                            |
| 3F100               | Did (s)he drink alcohol?                                                                                     | a4_05                                                                                                                                            |
| 3F110               | Did (s)he smoke tobacco (cigarette, cigar, pipe, etc.)?                                                      | a4_01                                                                                                                                            |
| 3G100               | Was (s)he adequately vaccinated?                                                                             | not available                                                                                                                                    |
| 3G110               | Did (s)he receive any treatment for the illness that led to death?                                           | a6_01                                                                                                                                            |
| 3G120               | Did (s)he receive oral rehydration salts?                                                                    | not available                                                                                                                                    |
| 3G130               | Did (s)he receive (or need) intravenous fluids (drip) treatment?                                             | not available                                                                                                                                    |
| 3G140               | Did (s)he receive (or need) a blood transfusion?                                                             | not available                                                                                                                                    |
| 3G150               | Did (s)he receive (or need) treatment/food through a tube passed through the nose?                           | not available                                                                                                                                    |

| WHO 2012<br>VA code | WHO 2012 InterVA-4 indicator                                                                                                                                           | Equivalent PHMRC variable(s)<br>(IHME_PHMRC_VA_DATA_CODEBOOK_Y2013M09D11_0.xlsx) |
|---------------------|------------------------------------------------------------------------------------------------------------------------------------------------------------------------|----------------------------------------------------------------------------------|
| 3G160               | Did (s)he receive (or need) injectable antibiotics?                                                                                                                    | not available                                                                    |
| 3G170               | Did (s)he have (or need) an operation for the illness?                                                                                                                 | not available                                                                    |
| 3G180               | Did (s)he have the operation within 1 month before death?                                                                                                              | not available                                                                    |
| 3G190               | Was (s)he discharged from hospital very ill?                                                                                                                           | not available                                                                    |
| 4A100               | In the final days before death, did (s)he travel to a hospital or health facility?                                                                                     | not available                                                                    |
| 4A110               | Did (s)he use motorised transport to get to the hospital or health facility?                                                                                           | not available                                                                    |
| 4A120               | Were there any problems during admission to the hospital or health facility?                                                                                           | not available                                                                    |
| 4A130               | Were there any problems with the way (s)he was treated (medical treatment, procedures, inter-personal attitudes, respect, dignity) in the hospital or health facility? | not available                                                                    |
| 4A140               | Were there any problems getting medications, or diagnostic tests in the hospital or health facility?                                                                   | not available                                                                    |
| 4A150               | Does it take more than 2 hours to get to the nearest hospital or health facility from the deceased's household?                                                        | not available                                                                    |
| 4A160               | In the final days before death, were there any doubts about whether medical care was needed?                                                                           | not available                                                                    |
| 4A170               | In the final days before death, was traditional medicine used?                                                                                                         | not available                                                                    |
| 4A180               | In the final days before death, did anyone use a telephone or cell phone to call for help?                                                                             | not available                                                                    |
| 4A190               | Over the course of illness, did the total costs of care and treatment prohibit other household payments?                                                               | not available                                                                    |
